# Supplementary material for: Self-assembly of Ni(ii) with a chiral ligand pair vs. mixture of the chiral ligand pair: structural features and recognition ability of Ni2L4 cages
Source: Royal Society of Chemistry journal article supplement (doi:10.1039/d4dt00762j), 2024-01-01
Supplement: d4dt00762j1.pdf [file d4dt00762j1.pdf]

<Electronic Supporting Information>

**Self-assembly of Ni(II) with chiral ligand pair vs mixture of chiral ligand pair: structural features and recognition ability of Ni<sub>2</sub>L<sub>4</sub> cages**

Jihun Han,<sup>‡a</sup> Hyo Jeong Back,<sup>‡a</sup> Mohammad M. Hossain,<sup>b</sup> Ok-Sang Jung,<sup>\*a</sup> and Young-A Lee<sup>\*c</sup>

*<sup>a</sup>Department of Chemistry, Pusan National University, Busan 46241, Republic of Korea*

*<sup>b</sup>Department of Electrochemistry, Korea Institute of Materials Science, Changwon 51508, Republic of Korea*

*<sup>c</sup>Department of Chemistry, Jeonbuk National University, Jeonju 54896, Republic of Korea*

\*Correspondence and requests for materials should be addressed to O.-S. Jung: [oksjung@pusan.ac.kr](mailto:oksjung@pusan.ac.kr)  
Y.-A. Lee: [ylee@jbnu.ac.kr](mailto:ylee@jbnu.ac.kr)

‡ These authors equally contributed to this work.

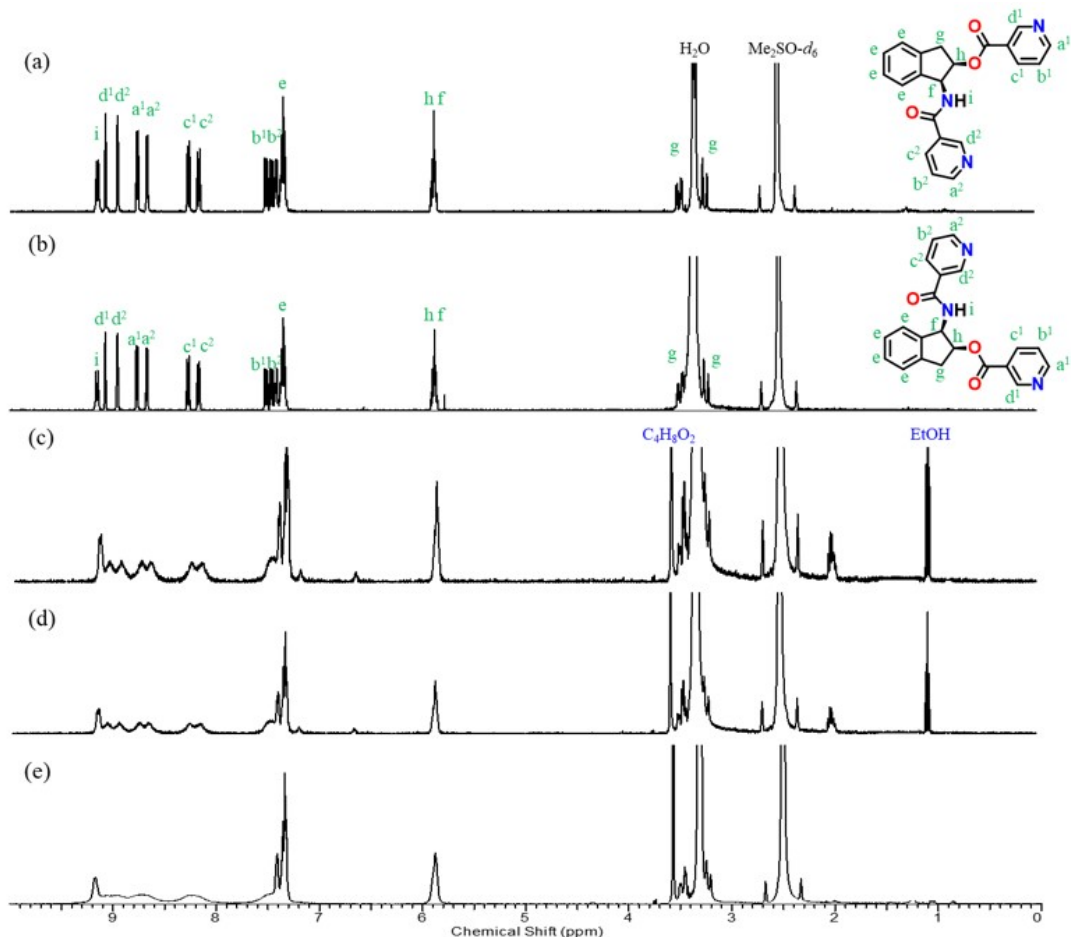

**Fig. S1**  $^1\text{H}$  NMR spectra (dissociated in  $\text{Me}_2\text{SO}-d_6$ ) of *s,r*-L (a), *r,s*-L (b),  $[\text{2Cl@Ni}_2\text{Cl}_2(\textit{s,r}\text{-L})_4(\text{H}_2\text{O})_2]\cdot 4\text{C}_4\text{H}_8\text{O}_2\cdot \text{EtOH}$  (c),  $[\text{2Cl@Ni}_2\text{Cl}_2(\textit{r,s}\text{-L})_4(\text{H}_2\text{O})_2]\cdot 4\text{C}_4\text{H}_8\text{O}_2\cdot \text{EtOH}$  (d), and  $[\text{2Cl}\cdot 2\text{H}_2\text{O@Ni}_2\text{Cl}_2(\textit{s,r}\text{-L})_2(\textit{r,s}\text{-L})_2(\text{H}_2\text{O})_2]\cdot 7\text{C}_4\text{H}_8\text{O}_2$  (e).

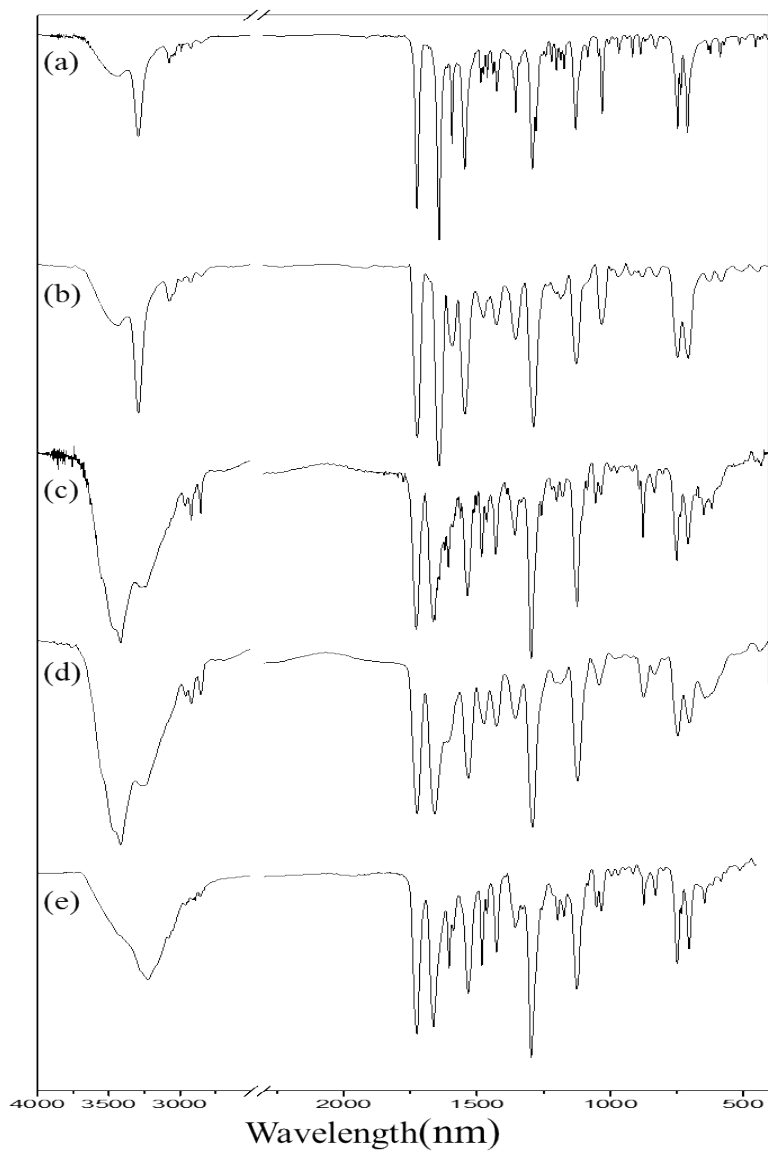

**Fig. S2** IR spectra of *s,r*-L (a), *r,s*-L (b),  $[2\text{Cl}@Ni_2Cl_2(s,r\text{-}L)_4(\text{H}_2\text{O})_2]\cdot 4\text{C}_4\text{H}_8\text{O}_2\cdot\text{EtOH}$  (c),  $[2\text{Cl}@Ni_2Cl_2(r,s\text{-}L)_4(\text{H}_2\text{O})_2]\cdot 4\text{C}_4\text{H}_8\text{O}_2\cdot\text{EtOH}$  (d), and  $[2\text{Cl}\cdot 2\text{H}_2\text{O}@Ni_2Cl_2(s,r\text{-}L)_2(r,s\text{-}L)_2(\text{H}_2\text{O})_2]\cdot 7\text{C}_4\text{H}_8\text{O}_2$  (e).

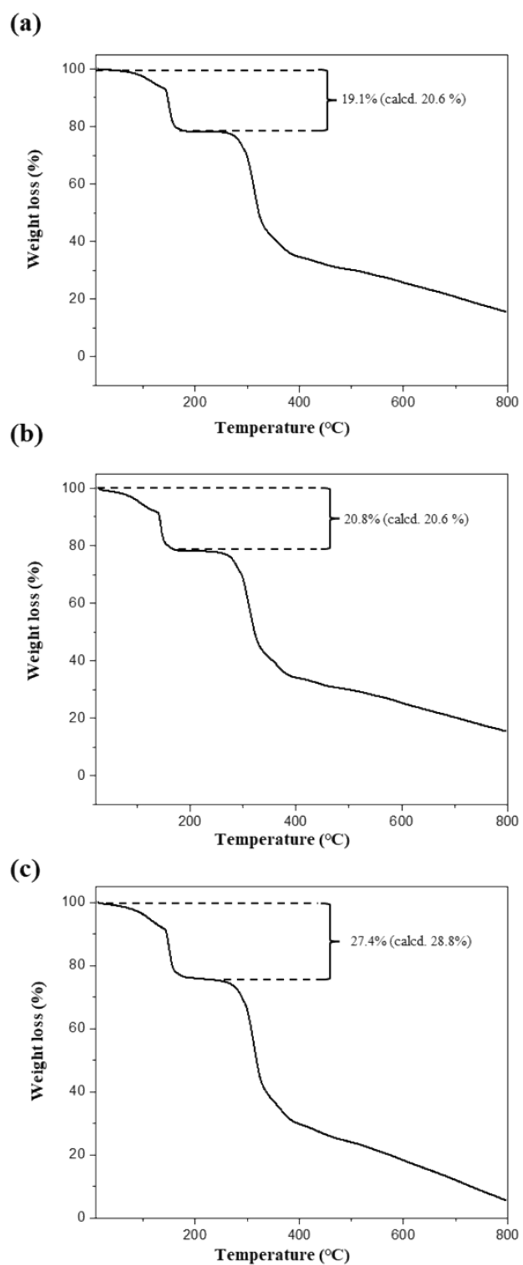

**Fig. S3** TG curves of  $[2\text{Cl}@Ni_2Cl_2(s,r-L)_4(H_2O)_2] \cdot 4C_4H_8O_2 \cdot EtOH$  (a),  $[2\text{Cl}@Ni_2Cl_2(r,s-L)_4(H_2O)_2] \cdot 4C_4H_8O_2 \cdot EtOH$  (b), and  $[2\text{Cl} \cdot 2H_2O@Ni_2Cl_2(s,r-L)_2(r,s-L)_2(H_2O)_2] \cdot 7C_4H_8O_2$  (c).

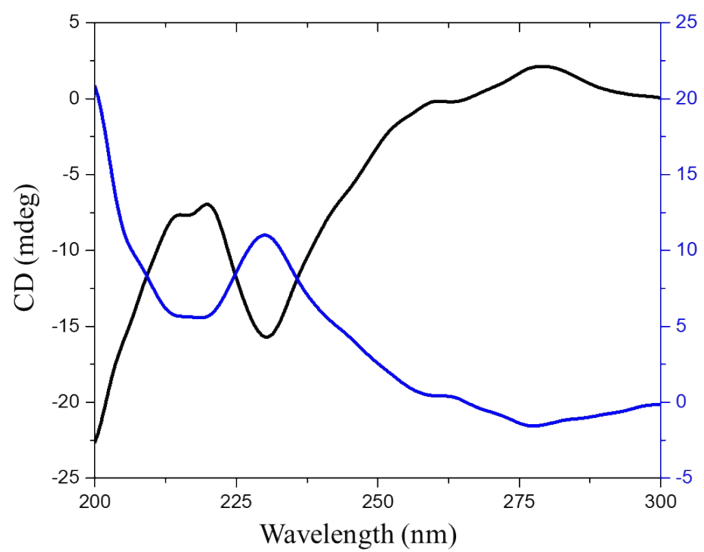

**Fig. S4** CD spectra for *s,r*-L (black line) and *r,s*-L (blue line) in MeOH.

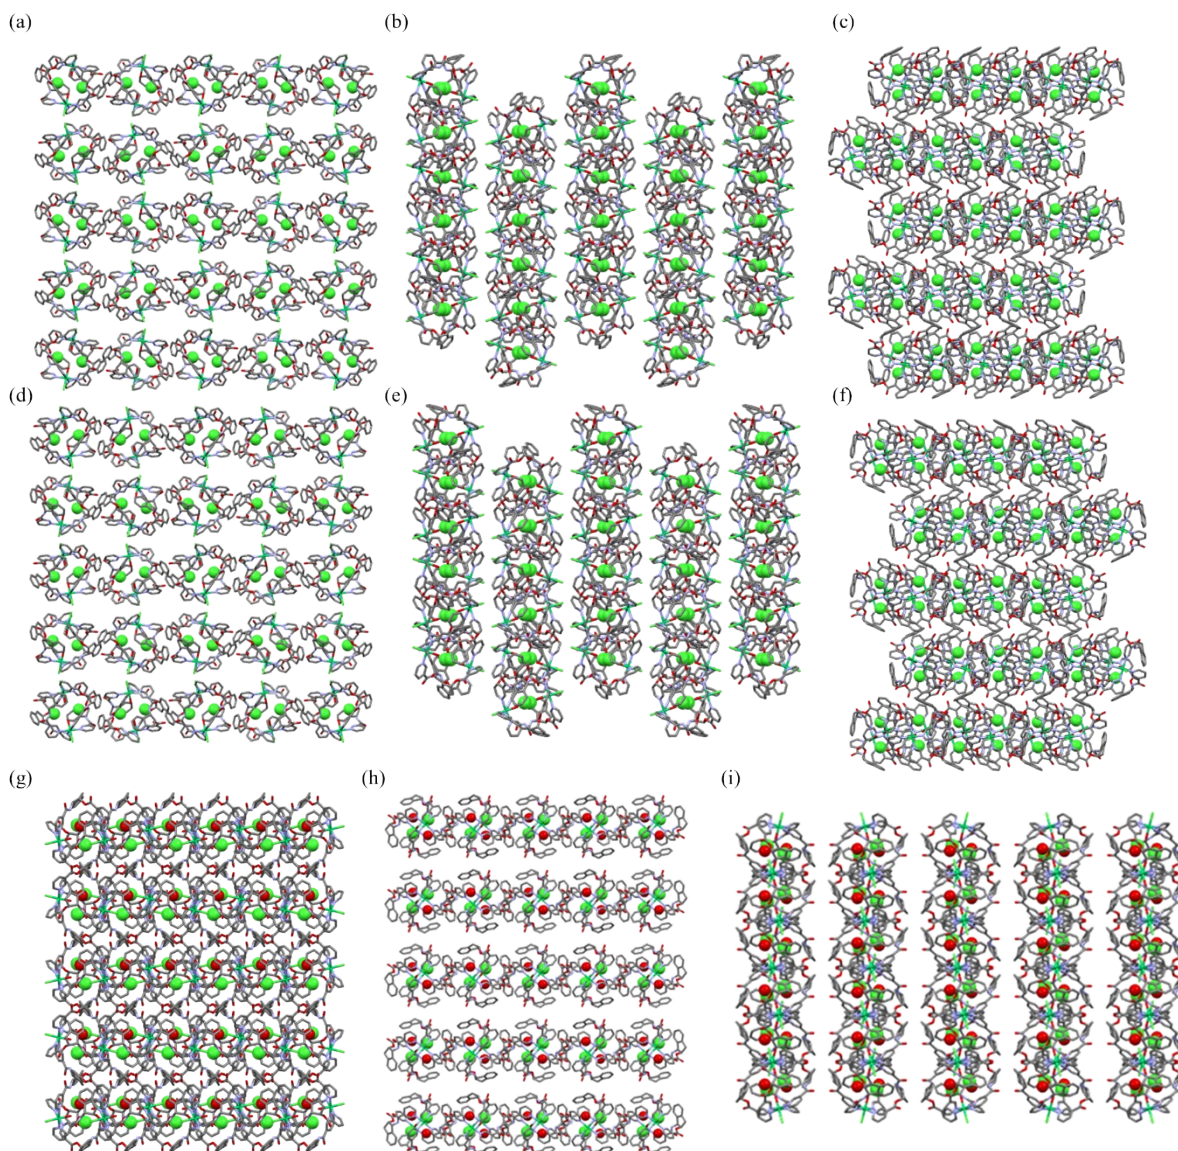

**Fig. S5** Packing structures of  $[2\text{Cl}@Ni_2\text{Cl}_2(s,r-L)_4(\text{H}_2\text{O})_2]\cdot 4\text{C}_4\text{H}_8\text{O}_2\cdot \text{EtOH}$  in a axis (a), b axis (b), c axis (c),  $[2\text{Cl}@Ni_2\text{Cl}_2(r,s-L)_4(\text{H}_2\text{O})_2]\cdot 4\text{C}_4\text{H}_8\text{O}_2\cdot \text{EtOH}$  in a axis (d), b axis (e), c axis (f), and  $[2\text{Cl}\cdot 2\text{H}_2\text{O}@Ni_2\text{Cl}_2(s,r-L)_2(r,s-L)_2(\text{H}_2\text{O})_2]\cdot 7\text{C}_4\text{H}_8\text{O}_2$  in a axis (g), b axis (h) and c axis (i).

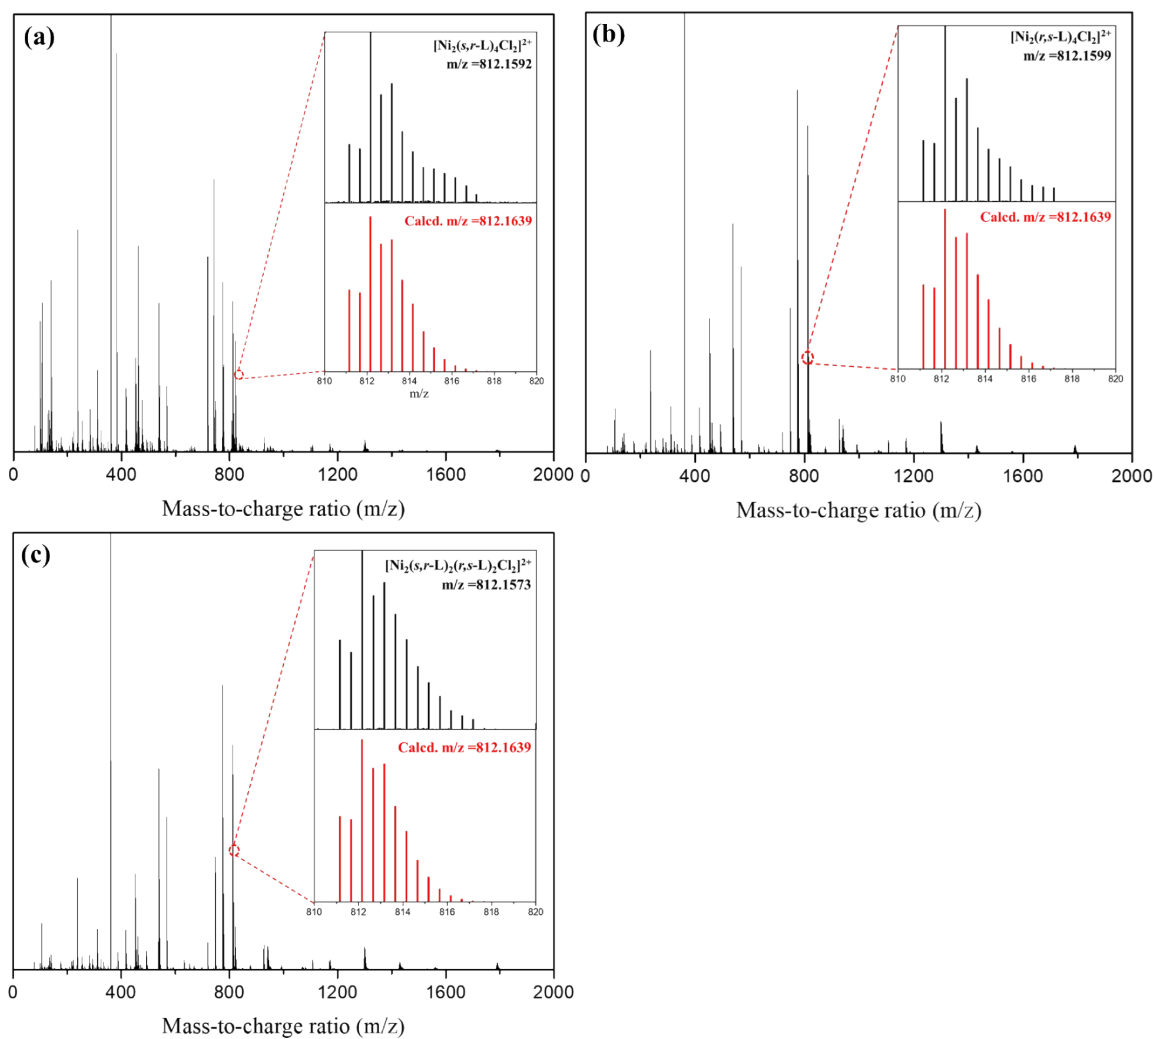

**Fig. S6** ESI-mass fragments of  $[2\text{Cl}@Ni_2Cl_2(s,r-L)_4(\text{H}_2\text{O})_2]\cdot 4\text{C}_4\text{H}_8\text{O}_2\cdot \text{EtOH}$  (a),  $[2\text{Cl}@Ni_2Cl_2(r,s-L)_4(\text{H}_2\text{O})_2]\cdot 4\text{C}_4\text{H}_8\text{O}_2\cdot \text{EtOH}$  (b), and  $[2\text{Cl}\cdot 2\text{H}_2\text{O}@Ni_2Cl_2(s,r-L)_2(r,s-L)_2(\text{H}_2\text{O})_2]\cdot 7\text{C}_4\text{H}_8\text{O}_2$  (c).

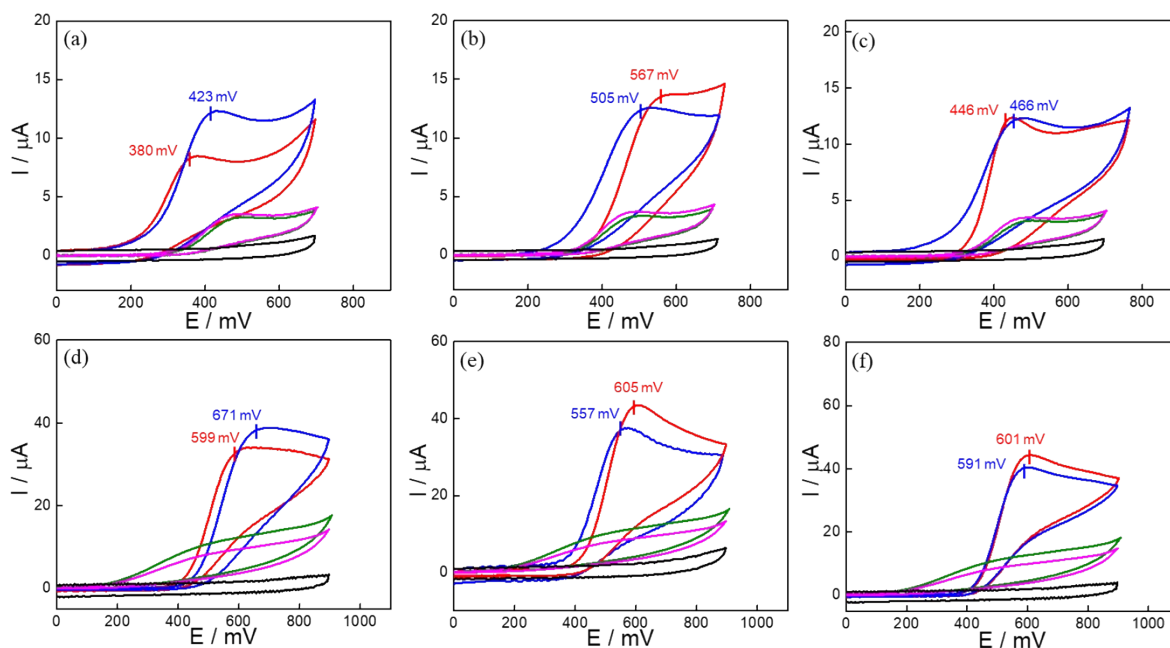

**Fig. S7** Cyclic voltammetry (CV) signals of *l*-tryptophan only (green line), *d*-tryptophan only (pink line), the cage (black line) and that cage in presence of 1.0 mM *l*-tryptophan and *d*-tryptophan (red line).  $[2\text{Cl}@Ni_2Cl_2(s,r-L)_4(H_2O)_2] \cdot 4C_4H_8O_2 \cdot EtOH$  (a);  $[2\text{Cl}@Ni_2Cl_2(r,s-L)_4(H_2O)_2] \cdot 4C_4H_8O_2 \cdot EtOH$  (b);  $[2\text{Cl} \cdot 2H_2O@Ni_2Cl_2(r,s-L)_2(s,r-L)_2(H_2O)_2] \cdot 7C_4H_8O_2$  (c). Cyclic voltammetry (CV) signals of *l*-cysteine only (green line), *d*-cysteine only (pink line), the cage (black line) and that cage in presence of 1.0 mM *l*-cysteine (blue line) and *d*-cysteine (red line).  $[2\text{Cl}@Ni_2Cl_2(s,r-L)_4(H_2O)_2] \cdot 4C_4H_8O_2 \cdot EtOH$  (d);  $[2\text{Cl}@Ni_2Cl_2(r,s-L)_4(H_2O)_2] \cdot 4C_4H_8O_2 \cdot EtOH$  (e);  $[2\text{Cl} \cdot 2H_2O@Ni_2Cl_2(r,s-L)_2(s,r-L)_2(H_2O)_2] \cdot 7C_4H_8O_2$  (f).



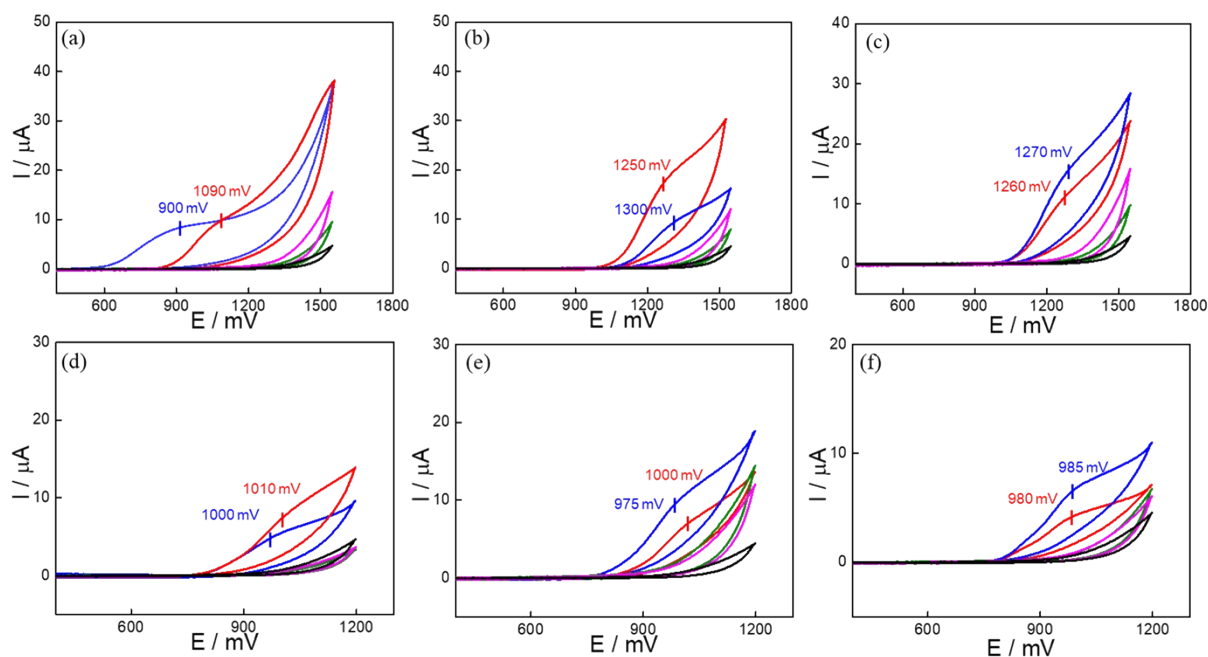

**Fig. S8** Cyclic voltammetry (CV) signals of *l*-histidine only (green line), *d*-histidine only (pink line), the cage (black line) and that cage in presence of 1.0 mM *l*-histidine (blue line) and *d*-histidine (red line).  $[2\text{Cl}@Ni_2Cl_2(s,r-L)_4(H_2O)_2] \cdot 4C_4H_8O_2 \cdot EtOH$  (a);  $[2\text{Cl}@Ni_2Cl_2(r,s-L)_4(H_2O)_2] \cdot 4C_4H_8O_2 \cdot EtOH$  (b);  $[2\text{Cl} \cdot 2H_2O@Ni_2Cl_2(r,s-L)_2(s,r-L)_2(H_2O)_2] \cdot 7C_4H_8O_2$  (c). Cyclic voltammetry (CV) signals of *l*-phenylalanine only (green line), *d*-phenylalanine only (pink line), the cage (black line) and that cage in presence of 1.0 mM *l*-phenylalanine (blue line) and *d*-phenylalanine (red line).  $[2\text{Cl}@Ni_2Cl_2(s,r-L)_4(H_2O)_2] \cdot 4C_4H_8O_2 \cdot EtOH$  (d);  $[2\text{Cl}@Ni_2Cl_2(r,s-L)_4(H_2O)_2] \cdot 4C_4H_8O_2 \cdot EtOH$  (e);  $[2\text{Cl} \cdot 2H_2O@Ni_2Cl_2(r,s-L)_2(s,r-L)_2(H_2O)_2] \cdot 7C_4H_8O_2$  (f).

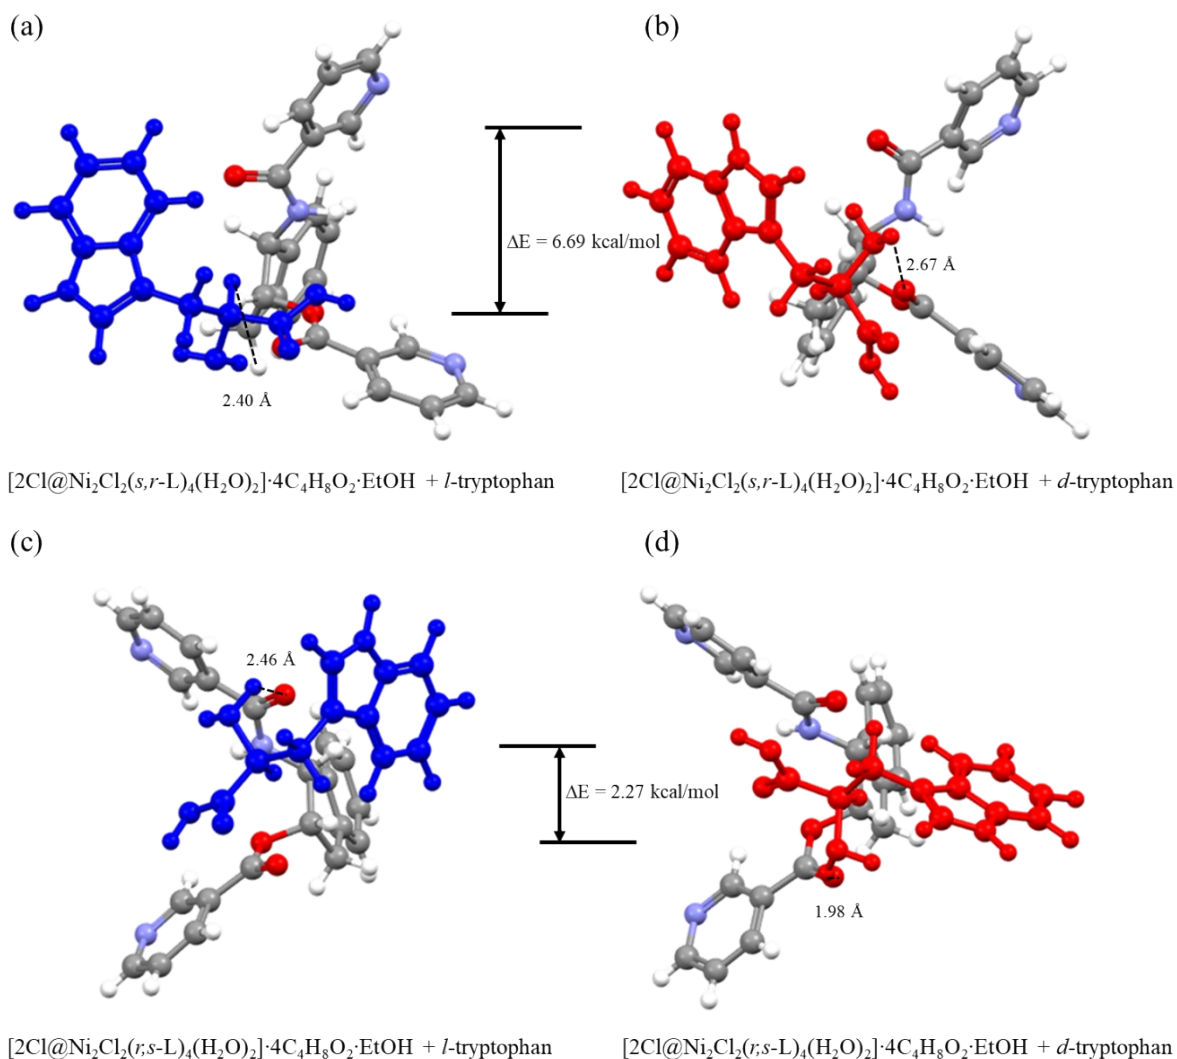

**Fig. S9** Computational simulation of ligand moiety of chiral cages and tryptophan via MM2 calculation: [2Cl@Ni<sub>2</sub>Cl<sub>2</sub>(*s,r*-L)<sub>4</sub>(H<sub>2</sub>O)<sub>2</sub>] $\cdot$ 4C<sub>4</sub>H<sub>8</sub>O<sub>2</sub> $\cdot$ EtOH with *l*-tryptophan (a), [2Cl@Ni<sub>2</sub>Cl<sub>2</sub>(*s,r*-L)<sub>4</sub>(H<sub>2</sub>O)<sub>2</sub>] $\cdot$ 4C<sub>4</sub>H<sub>8</sub>O<sub>2</sub> $\cdot$ EtOH with *d*-tryptophan (b), [2Cl@Ni<sub>2</sub>Cl<sub>2</sub>(*r,s*-L)<sub>4</sub>(H<sub>2</sub>O)<sub>2</sub>] $\cdot$ 4C<sub>4</sub>H<sub>8</sub>O<sub>2</sub> $\cdot$ EtOH with *l*-tryptophan (c), and [2Cl@Ni<sub>2</sub>Cl<sub>2</sub>(*r,s*-L)<sub>4</sub>(H<sub>2</sub>O)<sub>2</sub>] $\cdot$ 4C<sub>4</sub>H<sub>8</sub>O<sub>2</sub> $\cdot$ EtOH + *d*-tryptophan (d). The energy differences had been calculated by Chem3D with MM2 method.

**Table S1** Crystallographic data.

|                                         | $[2\text{Cl}@Ni_2Cl_2(s,r-L)_4(\text{H}_2\text{O})_2] \cdot 4\text{C}_4\text{H}_8\text{O}_2 \cdot \text{EtOH}$ | $[2\text{Cl}@Ni_2Cl_2(r,s-L)_4(\text{H}_2\text{O})_2] \cdot 4\text{C}_4\text{H}_8\text{O}_2 \cdot \text{EtOH}$ | $[2\text{Cl} \cdot 2\text{H}_2\text{O}@Ni_2Cl_2(r,s-L)_2(s,r-L)_2(\text{H}_2\text{O})_2] \cdot 7\text{C}_4\text{H}_8\text{O}_2$ |
|-----------------------------------------|----------------------------------------------------------------------------------------------------------------|----------------------------------------------------------------------------------------------------------------|---------------------------------------------------------------------------------------------------------------------------------|
| Formula                                 | $\text{C}_{102}\text{H}_{110}\text{Ni}_{12}\text{O}_{23}\text{Ni}_2\text{Cl}_4$                                | $\text{C}_{102}\text{H}_{110}\text{Ni}_{12}\text{O}_{23}\text{Ni}_2\text{Cl}_4$                                | $\text{C}_{112}\text{H}_{132}\text{Ni}_{12}\text{O}_{30}\text{Ni}_2\text{Cl}_4$                                                 |
| $M_w$                                   | 2131.23                                                                                                        | 2131.23                                                                                                        | 2385.51                                                                                                                         |
| Cryst. sys.                             | Orthorhombic                                                                                                   | Orthorhombic                                                                                                   | Monoclinic                                                                                                                      |
| Space group                             | $P2_12_12_1$                                                                                                   | $P2_12_12_1$                                                                                                   | $C2/c$                                                                                                                          |
| $a$ (Å)                                 | 14.855(3)                                                                                                      | 14.854(3)                                                                                                      | 30.615(6)                                                                                                                       |
| $b$ (Å)                                 | 26.201(5)                                                                                                      | 26.201(5)                                                                                                      | 15.581(2)                                                                                                                       |
| $c$ (Å)                                 | 26.599(5)                                                                                                      | 26.589(5)                                                                                                      | 23.797(4)                                                                                                                       |
| $\alpha$ (°)                            | -                                                                                                              | -                                                                                                              | -                                                                                                                               |
| $\beta$ (°)                             | -                                                                                                              | -                                                                                                              | 90.285(7)°                                                                                                                      |
| $\gamma$ (°)                            | -                                                                                                              | -                                                                                                              | -                                                                                                                               |
| $V$ (Å <sup>3</sup> )                   | 10353(4)                                                                                                       | 10348(4)                                                                                                       | 11351(3)                                                                                                                        |
| $Z$                                     | 4                                                                                                              | 4                                                                                                              | 4                                                                                                                               |
| $\rho$ (g cm <sup>-3</sup> )            | 1.367                                                                                                          | 1.368                                                                                                          | 1.396                                                                                                                           |
| $\mu$ (mm <sup>-1</sup> )               | 0.519                                                                                                          | 0.426                                                                                                          | 0.509                                                                                                                           |
| $R_{\text{int}}$                        | 0.1115                                                                                                         | 0.0540                                                                                                         | 0.1347                                                                                                                          |
| GoF on $F^2$                            | 0.957                                                                                                          | 1.002                                                                                                          | 1.046                                                                                                                           |
| $R_1$ [ $I > 2\sigma(I)$ ] <sup>a</sup> | 0.0666                                                                                                         | 0.0624                                                                                                         | 0.1322                                                                                                                          |
| $wR_2$ (all data) <sup>b</sup>          | 0.1942                                                                                                         | 0.1926                                                                                                         | 0.4158                                                                                                                          |

<sup>a</sup> $R_1 = \Sigma||F_o| - |F_c||/\Sigma|F_o|$ , <sup>b</sup> $wR_2 = (\Sigma[w(F_o^2 - F_c^2)^2]/\Sigma[w(F_o^2)^2])^{1/2}$

**Table S2** Selected bond length (Å) and angle (°).

| [2Cl@Ni <sub>2</sub> Cl <sub>2</sub> ( <i>s,r</i> -L) <sub>4</sub><br>(H <sub>2</sub> O) <sub>2</sub> ]-4C <sub>4</sub> H <sub>8</sub> O <sub>2</sub> ·EtOH |          | [2Cl@Ni <sub>2</sub> Cl <sub>2</sub> ( <i>r,s</i> -L) <sub>4</sub><br>(H <sub>2</sub> O) <sub>2</sub> ]-4C <sub>4</sub> H <sub>8</sub> O <sub>2</sub> ·EtOH |           | [2Cl·2H <sub>2</sub> O@Ni <sub>2</sub> Cl <sub>2</sub> ( <i>r,s</i> -L) <sub>2</sub><br>( <i>s,r</i> -L) <sub>2</sub> (H <sub>2</sub> O) <sub>2</sub> ]-7C <sub>4</sub> H <sub>8</sub> O <sub>2</sub> |                                  |
|-------------------------------------------------------------------------------------------------------------------------------------------------------------|----------|-------------------------------------------------------------------------------------------------------------------------------------------------------------|-----------|-------------------------------------------------------------------------------------------------------------------------------------------------------------------------------------------------------|----------------------------------|
| Cl(1)-Ni(1)                                                                                                                                                 | 2.386(1) | Cl(1)-Ni(1)                                                                                                                                                 | 2.387(1)  | Ni(1)-N(2A)                                                                                                                                                                                           | 2.105(7)                         |
| O(1)-Ni(1)                                                                                                                                                  | 2.060(3) | O(1)-Ni(1)                                                                                                                                                  | 2.057(3)  | Ni(1)-O(1)                                                                                                                                                                                            | 2.106(5)                         |
| Ni(1)-N(2B)                                                                                                                                                 | 2.117(4) | Ni(1)-N(2D)                                                                                                                                                 | 2.111(3)  | Ni(1)-N(11A) <sup>#1</sup>                                                                                                                                                                            | 2.115(7)                         |
| Ni(1)-N(2D)                                                                                                                                                 | 2.117(4) | Ni(1)-N(2B)                                                                                                                                                 | 2.112(3)  | Ni(1)-N(2B) <sup>#1</sup>                                                                                                                                                                             | 2.118(7)                         |
| Ni(1)-N(2C)                                                                                                                                                 | 2.133(4) | Ni(1)-N(2A)                                                                                                                                                 | 2.131(3)  | Ni(1)-N(11B)                                                                                                                                                                                          | 2.138(7)                         |
| Ni(1)-N(2A)                                                                                                                                                 | 2.135(4) | Ni(1)-N(2C)                                                                                                                                                 | 2.132(3)  | Ni(1)-Cl(1)                                                                                                                                                                                           | 2.383(2)                         |
|                                                                                                                                                             |          |                                                                                                                                                             |           |                                                                                                                                                                                                       |                                  |
| O(1)-Ni(1)-N(2B)                                                                                                                                            | 89.8(2)  | O(1)-Ni(1)-N(2D)                                                                                                                                            | 89.8(1)   | N(2A)-Ni(1)-O(1)                                                                                                                                                                                      | 90.4(2)                          |
| O(1)-Ni(1)-N(2D)                                                                                                                                            | 88.8(2)  | O(1)-Ni(1)-N(2B)                                                                                                                                            | 88.7(1)   | N(2A)-Ni(1)-N(11A) <sup>#1</sup>                                                                                                                                                                      | 176.6(3)                         |
| N(2B)-Ni(1)-N(2D)                                                                                                                                           | 178.1(2) | N(2D)-Ni(1)-N(2B)                                                                                                                                           | 178.1(1)  | O(1)-Ni(1)-N(11A) <sup>#1</sup>                                                                                                                                                                       | 87.7(2)                          |
| O(1)-Ni(1)-N(2C)                                                                                                                                            | 92.2(1)  | O(1)-Ni(1)-N(2A)                                                                                                                                            | 91.8(1)   | N(2A)-Ni(1)-N(2B) <sup>#1</sup>                                                                                                                                                                       | 90.5(3)                          |
| N(2B)-Ni(1)-N(2C)                                                                                                                                           | 88.7(2)  | N(2D)-Ni(1)-N(2A)                                                                                                                                           | 88.7(1)   | O(1)-Ni(1)-N(2B) <sup>#1</sup>                                                                                                                                                                        | 86.2(2)                          |
| N(2D)-Ni(1)-N(2C)                                                                                                                                           | 90.1(2)  | N(2B)-Ni(1)-N(2A)                                                                                                                                           | 90.2(1)   | N(11A) <sup>#1</sup> -Ni(1)-N(2B) <sup>#1</sup>                                                                                                                                                       | 92.1(3)                          |
| O(1)-Ni(1)-N(2A)                                                                                                                                            | 89.4(1)  | O(1)-Ni(1)-N(2C)                                                                                                                                            | 89.8(1)   | N(2A)-Ni(1)-N(11B)                                                                                                                                                                                    | 86.7(3)                          |
| N(2B)-Ni(1)-N(2A)                                                                                                                                           | 91.4(2)  | N(2D)-Ni(1)-N(2C)                                                                                                                                           | 91.4(1)   | O(1)-Ni(1)-N(11B)                                                                                                                                                                                     | 89.5(2)                          |
| N(2D)-Ni(1)-N(2A)                                                                                                                                           | 89.8(2)  | N(2B)-Ni(1)-N(2C)                                                                                                                                           | 89.8(1)   | N(11A) <sup>#1</sup> -Ni(1)-N(11B)                                                                                                                                                                    | 90.5(3)                          |
| N(2C)-Ni(1)-N(2A)                                                                                                                                           | 178.4(2) | N(2A)-Ni(1)-N(2C)                                                                                                                                           | 178.5(1)  | N(2B) <sup>#1</sup> -Ni(1)-N(11B)                                                                                                                                                                     | 174.8(2)                         |
| O(1)-Ni(1)-Cl(1)                                                                                                                                            | 178.2(1) | O(1)-Ni(1)-Cl(1)                                                                                                                                            | 178.28(8) | N(2A)-Ni(1)-Cl(1)                                                                                                                                                                                     | 91.7(2)                          |
| N(2B)-Ni(1)-Cl(1)                                                                                                                                           | 90.9(1)  | N(2D)-Ni(1)-Cl(1)                                                                                                                                           | 90.89(8)  | O(1)-Ni(1)-Cl(1)                                                                                                                                                                                      | 176.6(2)                         |
| N(2D)-Ni(1)-Cl(1)                                                                                                                                           | 90.6(1)  | N(2B)-Ni(1)-Cl(1)                                                                                                                                           | 90.61(9)  | N(11A) <sup>#1</sup> -Ni(1)-Cl(1)                                                                                                                                                                     | 90.4(2)                          |
| N(2C)-Ni(1)-Cl(1)                                                                                                                                           | 89.5(1)  | N(2A)-Ni(1)-Cl(1)                                                                                                                                           | 89.81(9)  | N(2B) <sup>#1</sup> -Ni(1)-Cl(1)                                                                                                                                                                      | 91.1(2)                          |
| N(2A)-Ni(1)-Cl(1)                                                                                                                                           | 88.9(1)  | N(2C)-Ni(1)-Cl(1)                                                                                                                                           | 88.66(9)  | N(11B)-Ni(1)-Cl(1)                                                                                                                                                                                    | 93.4(2)                          |
|                                                                                                                                                             |          |                                                                                                                                                             |           |                                                                                                                                                                                                       |                                  |
|                                                                                                                                                             |          |                                                                                                                                                             |           |                                                                                                                                                                                                       | <sup>#1</sup> -x+3/2,-y+1/2,-z+1 |
